# Supplementary material
Source: HighWire-hosted journal article supplement (http://cmajopen.ca/highwire/filestream/90154/field_highwire_adjunct_files/1/open-2022-0194-2-at.pdf)
Supplement: open-2022-0194-2-at.pdf [file open-2022-0194-2-at.pdf]

## Supplement

### Appendix S1

We enrolled 2767 COVID-19 patients in ARBs CORONA I. The following patients were excluded from the current analysis.

- Acute COVID-19 readmissions (n=83)
- Emergency Room admissions without hospitalization (n=149)
- Patients admitted to hospital but not due to acute COVID-19 (n=362; see file below)

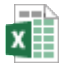

Appendix\_S1\_admission\_reasons.xlsx

- Patients with unknown discharge outcome or currently still hospitalized (n=19)
- Patients from sites which only enrolled ICU patients (Alberta; n=353)

Alberta site was different from the other participating sites in that it only enrolled patients who were admitted to ICU. Because the percentage of data from Alberta in ARBs CORONA I varied across waves (13%, 28%, 16% and 0% in waves 1, 2, 3 and Omicron respectively), the inclusion of Alberta site would thus confound and skew the crude results (for example, with the inclusion of Alberta data, ICU admission rate became 47%, 55%, 44% and 28% in waves 1, 2, 3 and Omicron respectively).

Pre-existing use of angiotensin receptor blockers and angiotensin-converting enzyme inhibitors prior to admission in patients included in the current study were 284/1794 (15.8%) and 332/1794 (18.5%) respectively.

## Appendix S2 – ARBs CORONA I CRF

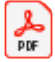

ARBSCORONA\_RED  
CapCRF\_V7.0\_22Mar

**Table E1** – Number of patients by province and site

| Variable                                           | Wave        |             |             |                 |
|----------------------------------------------------|-------------|-------------|-------------|-----------------|
|                                                    | 1st (n=520) | 2nd (n=575) | 3rd (n=265) | Omicron (n=441) |
| Province, n (%)                                    |             |             |             |                 |
| BC                                                 | 136 (26.2)  | 361 (62.8)  | 200 (75.5)  | 226 (51.2)      |
| ON                                                 | 24 (4.6)    | 203 (35.3)  | 65 (24.5)   | 184 (41.7)      |
| QC                                                 | 360 (69.2)  | 11 (1.9)    | 0 (0.0)     | 31 (7.0)        |
| Site, n (%)                                        |             |             |             |                 |
| St. Paul's Hospital, Vancouver, BC                 | 66 (12.7)   | 92 (16.0)   | 55 (20.8)   | 131 (29.7)      |
| Vancouver General Hospital, Vancouver, BC          | 55 (10.6)   | 157 (27.3)  | 109 (41.1)  | 0 (0.0)         |
| Surrey Memorial Hospital, Surrey, BC               | 15 (2.9)    | 112 (19.5)  | 36 (13.6)   | 95 (21.5)       |
| Humber River Hospital, North York, ON              | 0 (0.0)     | 45 (7.8)    | 6 (2.3)     | 0 (0.0)         |
| Kingston General Hospital, Kingston, ON            | 4 (0.8)     | 13 (2.3)    | 1 (0.4)     | 0 (0.0)         |
| Mount Sinai Hospital, Toronto, ON                  | 20 (3.8)    | 82 (14.3)   | 42 (15.8)   | 31 (7.0)        |
| Sunnybrook Hospital, Toronto, ON                   | 0 (0.0)     | 63 (11.0)   | 16 (6.0)    | 153 (34.7)      |
| McGill University Health Centre, Montreal, QC      | 258 (49.6)  | 0 (0.0)     | 0 (0.0)     | 0 (0.0)         |
| Centre hospitalier universitaire de Sherbrooke, QC | 102 (19.6)  | 11 (1.9)    | 0 (0.0)     | 31 (7.0)        |

**Table E2** – Co-morbidities of Omicron wave patients admitted with acute COVID-19 by vaccination status

| Variable                      | Vaccination status   |                  | P      |
|-------------------------------|----------------------|------------------|--------|
|                               | Unvaccinated (n=130) | ≥2 doses (n=242) |        |
| Co-morbidities, n (%)         |                      |                  |        |
| Any of the four below         | 82/130 (63.1)        | 205/242 (84.7)   | <0.001 |
| Chronic cardiac disease       | 39/130 (30.0)        | 112/241 (46.5)   | 0.002  |
| Chronic kidney disease        | 14/130 (10.8)        | 71/240 (29.6)    | <0.001 |
| Hypertension                  | 63/130 (48.5)        | 159/242 (65.7)   | 0.001  |
| Diabetes                      | 39/130 (30.0)        | 90/242 (37.2)    | 0.165  |
| Chronic pulmonary disease     | 23/130 (17.7)        | 54/241 (22.4)    | 0.285  |
| Liver disease                 | 2/130 (1.5)          | 14/239 (5.9)     | 0.052  |
| Chronic neurological disorder | 19/130 (14.6)        | 45/238 (18.9)    | 0.299  |
| Malignant neoplasm            | 11/130 (8.5)         | 48/240 (20.0)    | 0.004  |
| Chronic hematologic disease   | 7/130 (5.4)          | 51/241 (21.2)    | <0.001 |
| AIDS / HIV                    | 2/127 (1.6)          | 1/238 (0.4)      | 0.278  |
| Rheumatologic disorder        | 15/130 (11.5)        | 32/240 (13.3)    | 0.621  |
| Dementia                      | 3/130 (2.3)          | 24/241 (10.0)    | 0.007  |
| Malnutrition                  | 1/129 (0.8)          | 2/241 (0.8)      | 1.000  |
| Obesity                       | 10/130 (7.7)         | 16/229 (7.0)     | 0.804  |

P value was based on Chi-square test or Fisher's exact test as appropriate.

**Table E3** – COVID-19 therapies during the hospital course of Omicron wave patients admitted with acute COVID-19 by vaccination status

| Variable                                  | Vaccination status   |                  | P     |
|-------------------------------------------|----------------------|------------------|-------|
|                                           | Unvaccinated (n=130) | ≥2 doses (n=242) |       |
| Co-intervention while hospitalized, n (%) |                      |                  |       |
| Antiviral agent                           | 34/129 (26.4)        | 81/241 (33.6)    | 0.151 |
| Remdesivir                                | 27/129 (20.9)        | 58/241 (24.1)    | 0.494 |
| Antibiotic                                | 92/130 (70.8)        | 163/242 (67.4)   | 0.499 |
| Corticosteroid                            | 109/130 (83.8)       | 182/242 (75.2)   | 0.054 |
| Dexamethasone                             | 99/130 (76.2)        | 159/242 (65.7)   | 0.037 |
| Antifungal agent                          | 10/129 (7.8)         | 14/241 (5.8)     | 0.470 |

P value was based on Chi-square test or Fisher's exact test as appropriate.

**Table E4**– Baseline characteristics of Omicron COVID-19 wave versus prior wave patients admitted to hospital for acute COVID-19.

| Variable                                                                | Wave           |                |                |                 | p <sup>1</sup> | p <sup>2</sup> | p <sup>3</sup> |
|-------------------------------------------------------------------------|----------------|----------------|----------------|-----------------|----------------|----------------|----------------|
|                                                                         | 1st (n=520)    | 2nd (n=575)    | 3rd (n=265)    | Omicron (n=441) |                |                |                |
| ARBs/ACEi prior to admission                                            |                |                |                |                 | 0.376          | 0.102          | 0.178          |
| Unknown                                                                 | 7              | 0              | 1              | 0               |                |                |                |
| None                                                                    | 1178 (65.7)    | 344 (66.2)     | 364 (63.4)     | 186 (70.2)      |                |                |                |
| ARBs                                                                    | 284 (15.8)     | 82 (15.8)      | 105 (18.3)     | 38 (14.3)       |                |                |                |
| ACEi                                                                    | 332 (18.5)     | 94 (18.1)      | 105 (18.3)     | 41 (15.5)       |                |                |                |
| Sex, n (%)                                                              |                |                |                |                 | 0.371          | 0.578          | 0.706          |
| Unknown                                                                 | 1              | 0              | 0              | 1               |                |                |                |
| Male                                                                    | 293 (56.5)     | 351 (61.0)     | 161 (60.8)     | 261 (59.3)      |                |                |                |
| Female                                                                  | 226 (43.5)     | 224 (39.0)     | 104 (39.2)     | 179 (40.7)      |                |                |                |
| Age, mean (SD)                                                          | 70.2 (16.3)    | 65.8 (17.3)    | 63.0 (17.1)    | 70.1 (15.2)     | 0.893          | <0.001         | <0.001         |
| Received any COVID-19 vaccine prior to admission, n (%)                 | 0/520 (0.0)    | 3/574 (0.5)    | 21/256 (8.2)   | 261/391 (66.8)  | <0.001         | <0.001         | <0.001         |
| Received at least 2 doses of COVID-19 vaccine prior to admission, n (%) | 0/520 (0.0)    | 0/574 (0.0)    | 0/256 (0.0)    | 242/390 (62.1)  | <0.001         | <0.001         | <0.001         |
| Admitted to ICU on hospital admission day, n (%)                        | 104 (20.0)     | 83 (14.4)      | 35 (13.3)      | 64 (14.5)       | 0.027          | 0.960          | 0.648          |
| Organ support on admission day                                          |                |                |                |                 |                |                |                |
| Invasive mechanical ventilation, n (%)                                  | 55/520 (10.6)  | 34/575 (5.9)   | 16/265 (6.0)   | 20/441 (4.5)    | <0.001         | 0.332          | 0.380          |
| RRT or dialysis, n (%)                                                  | 8/511 (1.6)    | 7/570 (1.2)    | 4/262 (1.5)    | 8/439 (1.8)     | 0.759          | 0.439          | 0.770          |
| Vasopressors, n (%)                                                     | 35/520 (6.7)   | 33/575 (5.7)   | 14/265 (5.3)   | 18/440 (4.1)    | 0.074          | 0.234          | 0.461          |
| Temperature (°C) - mean (SD)                                            | 37.5 (0.9)     | 37.4 (0.9)     | 37.4 (0.9)     | 37.1 (0.9)      | <0.001         | <0.001         | <0.001         |
| Missing, n                                                              | 19             | 9              | 3              | 16              |                |                |                |
| Heart rate (beats per minute) - mean (SD)                               | 91.4 (20.6)    | 95.5 (20.3)    | 96.7 (19.2)    | 92.6 (21.5)     | 0.382          | 0.031          | 0.010          |
| Missing, n                                                              | 6              | 4              | 3              | 2               |                |                |                |
| Respiratory rate (breaths per minute) - mean (SD)                       | 22.9 (6.4)     | 24.9 (7.9)     | 24.1 (7.5)     | 23.2 (7.7)      | 0.413          | 0.001          | 0.144          |
| Missing, n                                                              | 15             | 6              | 4              | 12              |                |                |                |
| sBP - mean (SD)                                                         | 128.8 (22.9)   | 130.5 (23.5)   | 126.9 (20.6)   | 131.2 (26.9)    | 0.132          | 0.648          | 0.027          |
| Missing, n                                                              | 2              | 5              | 2              | 7               |                |                |                |
| dBp - mean (SD)                                                         | 73.7 (11.9)    | 74.3 (13.2)    | 72.4 (12.3)    | 73.9 (31.3)     | 0.060          | 0.013          | 0.760          |
| Missing, n                                                              | 3              | 14             | 9              | 9               |                |                |                |
| Oxygen saturation (SaO <sub>2</sub> ; %) - mean (SD)                    | 93.5 (4.2)     | 90.8 (8.5)     | 91.1 (7.8)     | 93.1 (6.7)      | 0.359          | <0.001         | <0.001         |
| Missing, n                                                              | 13             | 3              | 2              | 5               |                |                |                |
| Required oxygen therapy, n (%)                                          | 186/516 (36.0) | 174/544 (32.0) | 87/253 (34.4)  | 147/426 (34.5)  | 0.623          | 0.407          | 0.975          |
| WBC count ( x10 <sup>3</sup> /μL) - Median (IQR)                        | 6.5 (4.9, 8.6) | 6.9 (5.1, 9.2) | 6.3 (4.7, 8.8) | 7.3 (5.1, 9.9)  | 0.006          | 0.265          | 0.014          |
| Missing, n                                                              | 17             | 6              | 4              | 3               |                |                |                |

| Variable                           | Wave                  |                       |                       |                        | P <sup>1</sup> | P <sup>2</sup> | P <sup>3</sup> |
|------------------------------------|-----------------------|-----------------------|-----------------------|------------------------|----------------|----------------|----------------|
|                                    | 1st (n=520)           | 2nd (n=575)           | 3rd (n=265)           | Omicron (n=441)        |                |                |                |
| Haemoglobin (g/L) - Median (IQR)   | 130.0 (118.0, 145.0)  | 132.0 (117.0, 145.0)  | 134.0 (119.0, 146.0)  | 127.0 (111.0, 141.0)   | 0.002          | <0.001         | <0.001         |
| Missing, n                         | 15                    | 7                     | 4                     | 3                      |                |                |                |
| Creatinine (µmol/L) - Median (IQR) | 84.0 (68.0, 114.0)    | 87.0 (70.0, 120.5)    | 82.0 (66.0, 106.0)    | 95.0 (70.0, 136.0)     | 0.001          | 0.057          | <0.001         |
| Missing, n                         | 10                    | 11                    | 7                     | 4                      |                |                |                |
| ALT (U/L) - Median (IQR)           | 29.0 (17.0, 50.5)     | 35.0 (22.0, 57.0)     | 38.5 (23.0, 63.0)     | 23.0 (16.0, 38.0)      | 0.003          | <0.001         | <0.001         |
| Missing, n (%)                     | 156                   | 91                    | 39                    | 122                    |                |                |                |
| AST (U/L) - Median (IQR)           | 45.0 (26.0, 77.0)     | 46.0 (32.0, 77.0)     | 47.0 (38.0, 74.0)     | 38.5 (23.0, 59.0)      | 0.082          | 0.002          | <0.001         |
| Missing, n (%)                     | 430                   | 271                   | 106                   | 343                    |                |                |                |
| D-Dimer (ng/mL)- Median (IQR)      | 970.0 (580.0, 1860.0) | 912.5 (597.0, 1905.0) | 876.0 (636.5, 1423.5) | 1117.0 (578.0, 1892.0) | 0.622          | 0.801          | 0.355          |
| Missing, n (%)                     | 343                   | 325                   | 105                   | 346                    |                |                |                |

P value was based on Chi-square test or Fisher's exact test as appropriate.

1. Comparison between wave 1 and Omicron
2. Comparison between wave 2 and Omicron
3. Comparison between wave 3 and Omicron

**Table E5.** COVID-19 therapies during the hospital course of Omicron COVID-19 wave versus prior wave patients admitted to hospital for acute COVID-19.

| Variable                                  | Wave           |                |                |                 | p <sup>1</sup> | p <sup>2</sup> | p <sup>3</sup> |
|-------------------------------------------|----------------|----------------|----------------|-----------------|----------------|----------------|----------------|
|                                           | 1st (n=520)    | 2nd (n=575)    | 3rd (n=265)    | Omicron (n=441) |                |                |                |
| Co-intervention while hospitalized, n (%) |                |                |                |                 |                |                |                |
| Antiviral agent                           | 72/516 (14.0)  | 107/572 (18.7) | 42/265 (15.8)  | 134/439 (30.5)  | <0.001         | <0.001         | <0.001         |
| Remdesivir                                | 8/516 (1.6)    | 96/572 (16.8)  | 27/265 (10.2)  | 99/439 (22.6)   | <0.001         | 0.021          | <0.001         |
| Antibiotic                                | 434/520 (83.5) | 488/575 (84.9) | 210/265 (79.2) | 306/441 (69.4)  | <0.001         | <0.001         | 0.004          |
| Corticosteroid                            | 160/520 (30.8) | 501/575 (87.1) | 241/265 (90.9) | 340/441 (77.1)  | <0.001         | <0.001         | <0.001         |
| Dexamethasone                             | 56/520 (10.8)  | 484/575 (84.2) | 235/265 (88.7) | 296/441 (67.1)  | <0.001         | <0.001         | <0.001         |
| Antifungal agent                          | 34/520 (6.5)   | 24/575 (4.2)   | 22/265 (8.3)   | 29/439 (6.6)    | 0.966          | 0.085          | 0.400          |

P value was based on Chi-square test or Fisher's exact test as appropriate.

1. Comparison between wave 1 and Omicron
2. Comparison between wave 2 and Omicron
3. Comparison between wave 3 and Omicron



**Table E6– Outcomes of Omicron COVID-19 wave versus prior wave patients admitted to hospital for acute COVID-19.**

| Variable                                            | Wave             |                  |                   |                   |
|-----------------------------------------------------|------------------|------------------|-------------------|-------------------|
|                                                     | 1st (n=520)      | 2nd (n=575)      | 3rd (n=265)       | Omicron (n=441)   |
| 28-day mortality, n (%)                             | 95/520 (18.3)    | 93/575 (16.2)    | 19/264 (7.2)      | 42/433 (9.7)      |
| In-hospital death, n (%)                            | 111/520 (21.3)   | 103/575 (17.9)   | 25/265 (9.4)      | 63/441 (14.3)     |
| Admitted to ICU, n (%)                              | 201/520 (38.7)   | 217/575 (37.7)   | 89/264 (33.7)     | 121/441 (27.4)    |
| Septic shock, n (%)                                 | 50/510 (9.8)     | 44/547 (8.0)     | 15/255 (5.9)      | 39/430 (9.1)      |
| Acute respiratory distress syndrome, n (%)          | 107/490 (21.8)   | 100/540 (18.5)   | 34/256 (13.3)     | 66/437 (15.1)     |
| Acute kidney injury, n (%)                          | 131/513 (25.5)   | 132/538 (24.5)   | 34/246 (13.8)     | 119/429 (27.7)    |
| Acute cardiac injury, n (%)                         | 40/495 (8.1)     | 47/547 (8.6)     | 17/252 (6.7)      | 18/418 (4.3)      |
| Organ support while hospitalized, n (%)             |                  |                  |                   |                   |
| Invasive mechanical ventilation                     | 130/520 (25.0)   | 118/575 (20.5)   | 42/265 (15.8)     | 61/441 (13.8)     |
| RRT or dialysis                                     | 33/511 (6.5)     | 30/570 (5.3)     | 7/262 (2.7)       | 30/439 (6.8)      |
| Vasopressors                                        | 120/520 (23.1)   | 125/575 (21.7)   | 49/265 (18.5)     | 70/440 (15.9)     |
| Organ support during first 14 days, n (%)           |                  |                  |                   |                   |
| Invasive mechanical ventilation                     | 127/520 (24.4)   | 116/575 (20.2)   | 40/265 (15.1)     | 53/439 (12.1)     |
| RRT or dialysis                                     | 26/508 (5.1)     | 24/568 (4.2)     | 6/262 (2.3)       | 23/436 (5.3)      |
| Vasopressors                                        | 116/520 (22.3)   | 122/574 (21.3)   | 47/264 (17.8)     | 62/437 (14.2)     |
| DAF invasive mechanical ventilation - first 14 days |                  |                  |                   |                   |
| Mean (SD)                                           | 10.0 (5.9)       | 11.0 (5.3)       | 12.1 (4.4)        | 12.5 (4.0)        |
| Unknown, n                                          | 2                | 2                | 3                 | 18                |
| DAF RRT- first 14 days                              |                  |                  |                   |                   |
| Mean (SD)                                           | 11.8 (5.0)       | 12.3 (4.5)       | 13.1 (3.3)        | 13.1 (3.2)        |
| Unknown, n                                          | 11               | 5                | 2                 | 23                |
| DAF Vasopressors - first 14 days                    |                  |                  |                   |                   |
| Mean (SD)                                           | 10.7 (5.5)       | 11.3 (5.0)       | 12.4 (3.9)        | 12.6 (3.8)        |
| Unknown, n                                          | 2                | 2                | 2                 | 20                |
| Hospital length of stay- decedents                  |                  |                  |                   |                   |
| n                                                   | 111              | 103              | 24                | 48                |
| Median (IQR)                                        | 11.0 (6.0, 21.0) | 11.0 (7.0, 20.0) | 12.0 (9.5, 24.0)  | 16.5 (9.5, 35.5)  |
| Range                                               | (0.0, 63.0)      | (1.0, 44.0)      | (2.0, 62.0)       | (2.0, 246.0)      |
| Hospital length of stay- survivors                  |                  |                  |                   |                   |
| n                                                   | 409              | 471              | 240               | 378               |
| Median (IQR)                                        | 15.0 (7.0, 26.0) | 9.0 (5.0, 17.0)  | 9.0 (5.0, 17.0)   | 8.0 (4.0, 16.0)   |
| Range                                               | (2.0, 151.0)     | (2.0, 313.0)     | (2.0, 114.0)      | (1.0, 143.0)      |
| ICU length of stay - decedents                      |                  |                  |                   |                   |
| n                                                   | 51               | 57               | 12                | 37                |
| Median (IQR)                                        | 15.0 (5.0, 26.0) | 12.0 (7.0, 21.0) | 21.5 (10.0, 45.5) | 15.0 (10.0, 29.0) |
| Range                                               | (0.0, 61.0)      | (0.0, 38.0)      | (3.0, 57.0)       | (0.0, 246.0)      |
| ICU length of stay - survivors                      |                  |                  |                   |                   |
| n                                                   | 149              | 159              | 73                | 77                |
| Median (IQR)                                        | 10.0 (4.0, 17.0) | 7.0 (4.0, 12.0)  | 9.0 (3.0, 16.0)   | 6.0 (3.0, 12.0)   |
| Range                                               | (0.0, 92.0)      | (0.0, 113.0)     | (1.0, 75.0)       | (0.0, 85.0)       |

**Figure E1.** Comorbidities of patients in Omicron wave versus prior wave patients admitted to hospital for acute COVID-19.

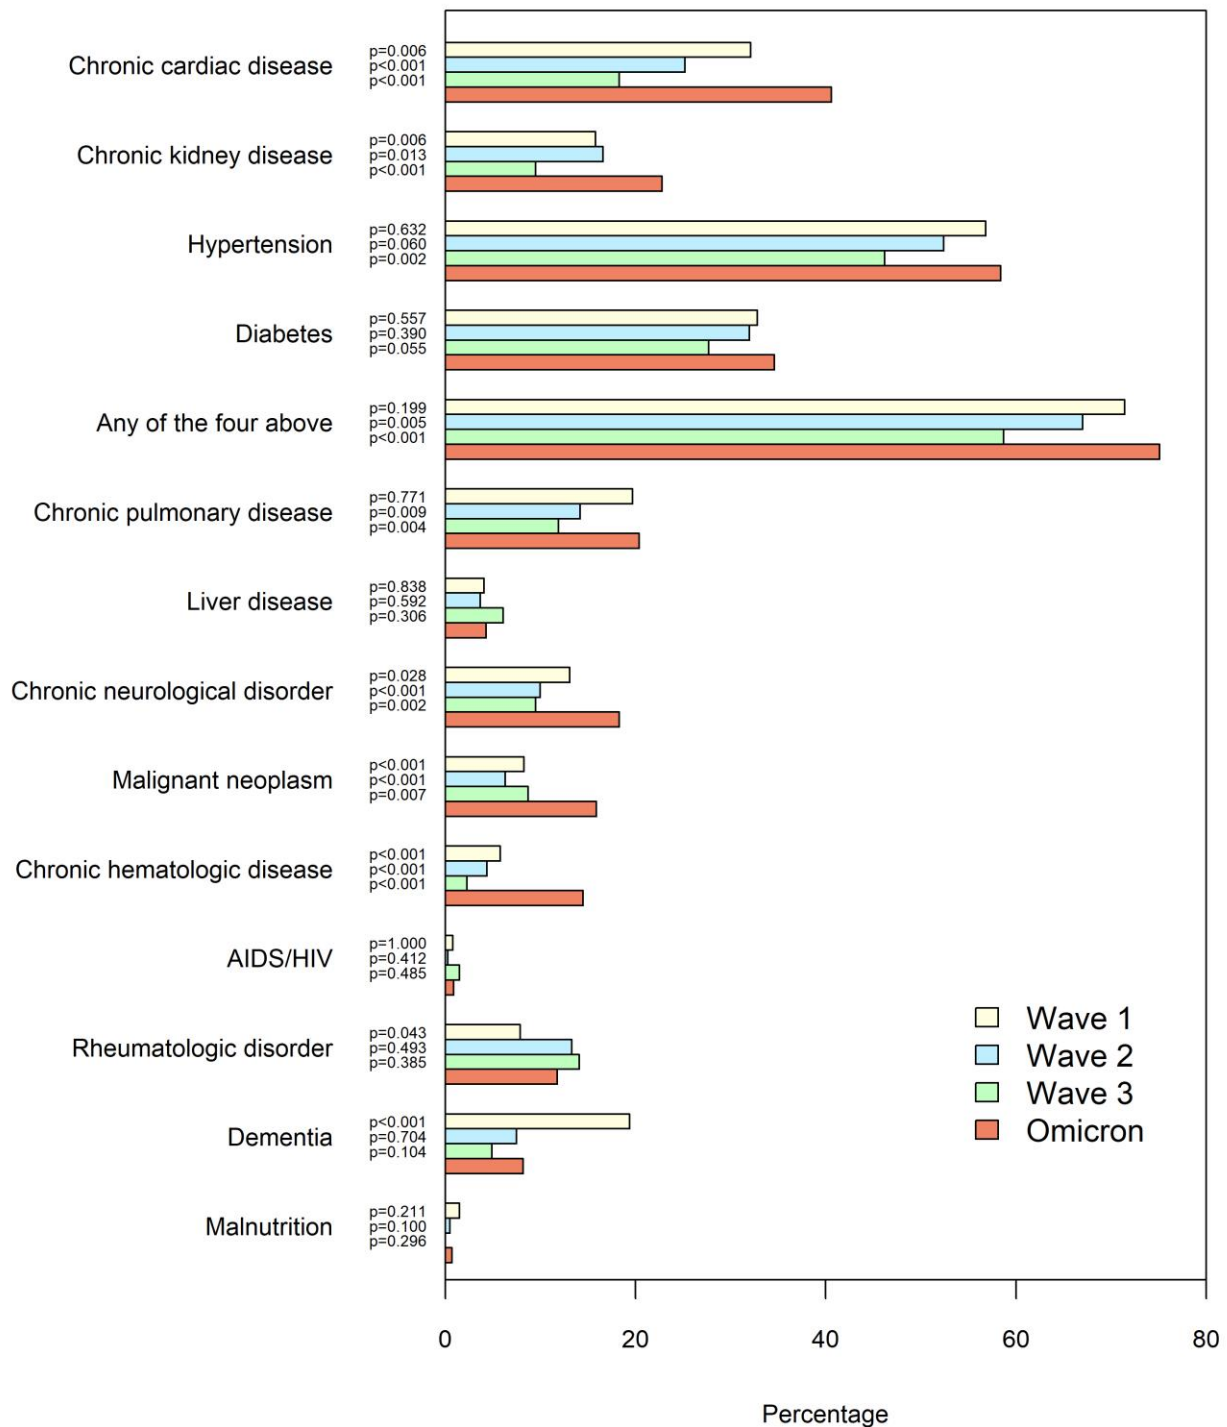

P value was based on Chi-square test or Fisher's exact test as appropriate and was for the comparison between Omicron wave and waves 1,2 and 3.

| Variable                      | Wave           |                |                |                 | p <sup>1</sup> | p <sup>2</sup> | p <sup>3</sup> |
|-------------------------------|----------------|----------------|----------------|-----------------|----------------|----------------|----------------|
|                               | 1st (n=520)    | 2nd (n=575)    | 3rd (n=265)    | Omicron (n=441) |                |                |                |
| Co-morbidities, n (%)         |                |                |                |                 |                |                |                |
| Any of the four below         | 370/518 (71.4) | 383/572 (67.0) | 155/264 (58.7) | 331/441 (75.1)  | 0.207          | 0.005          | <0.001         |
| Chronic cardiac disease       | 166/517 (32.1) | 143/568 (25.2) | 48/262 (18.3)  | 179/440 (40.7)  | 0.006          | <0.001         | <0.001         |
| Chronic kidney disease        | 82/519 (15.8)  | 95/573 (16.6)  | 25/263 (9.5)   | 100/438 (22.8)  | 0.006          | 0.013          | <0.001         |
| Hypertension                  | 295/519 (56.8) | 300/572 (52.4) | 121/262 (46.2) | 257/441 (58.3)  | 0.654          | 0.064          | 0.002          |
| Diabetes                      | 170/518 (32.8) | 183/571 (32.0) | 73/264 (27.7)  | 152/441 (34.5)  | 0.590          | 0.418          | 0.060          |
| Chronic pulmonary disease     | 102/519 (19.7) | 81/570 (14.2)  | 31/261 (11.9)  | 90/440 (20.5)   | 0.757          | 0.009          | 0.004          |
| Liver disease                 | 21/517 (4.1)   | 21/573 (3.7)   | 16/264 (6.1)   | 19/438 (4.3)    | 0.832          | 0.586          | 0.310          |
| Chronic neurological disorder | 68/519 (13.1)  | 57/572 (10.0)  | 25/262 (9.5)   | 80/437 (18.3)   | 0.027          | <0.001         | 0.002          |
| Malignant neoplasm            | 43/517 (8.3)   | 36/567 (6.3)   | 23/263 (8.7)   | 70/439 (15.9)   | <0.001         | <0.001         | 0.006          |
| Chronic hematologic disease   | 30/518 (5.8)   | 25/572 (4.4)   | 6/263 (2.3)    | 64/440 (14.5)   | <0.001         | <0.001         | <0.001         |
| AIDS / HIV                    | 4/491 (0.8)    | 2/573 (0.3)    | 4/264 (1.5)    | 4/433 (0.9)     | 1.000          | 0.411          | 0.486          |
| Rheumatologic disorder        | 41/517 (7.9)   | 76/573 (13.3)  | 37/263 (14.1)  | 52/439 (11.8)   | 0.042          | 0.501          | 0.391          |
| Dementia                      | 100/516 (19.4) | 43/572 (7.5)   | 13/263 (4.9)   | 36/440 (8.2)    | <0.001         | 0.696          | 0.103          |
| Malnutrition                  | 8/517 (1.5)    | 3/573 (0.5)    | 0/264 (0.0)    | 3/439 (0.7)     | 0.212          | 1.000          | 0.295          |

| Variable | Wave          |              |               |                 | p <sup>1</sup> | p <sup>2</sup> | p <sup>3</sup> |
|----------|---------------|--------------|---------------|-----------------|----------------|----------------|----------------|
|          | 1st (n=520)   | 2nd (n=575)  | 3rd (n=265)   | Omicron (n=441) |                |                |                |
| Obesity  | 53/482 (11.0) | 53/571 (9.3) | 25/244 (10.2) | 31/426 (7.3)    | 0.054          | 0.260          | 0.182          |

**Figure E2.** Comparison of outcomes between COVID-19 Omicron and prior waves by regression analysis – among unvaccinated patients.

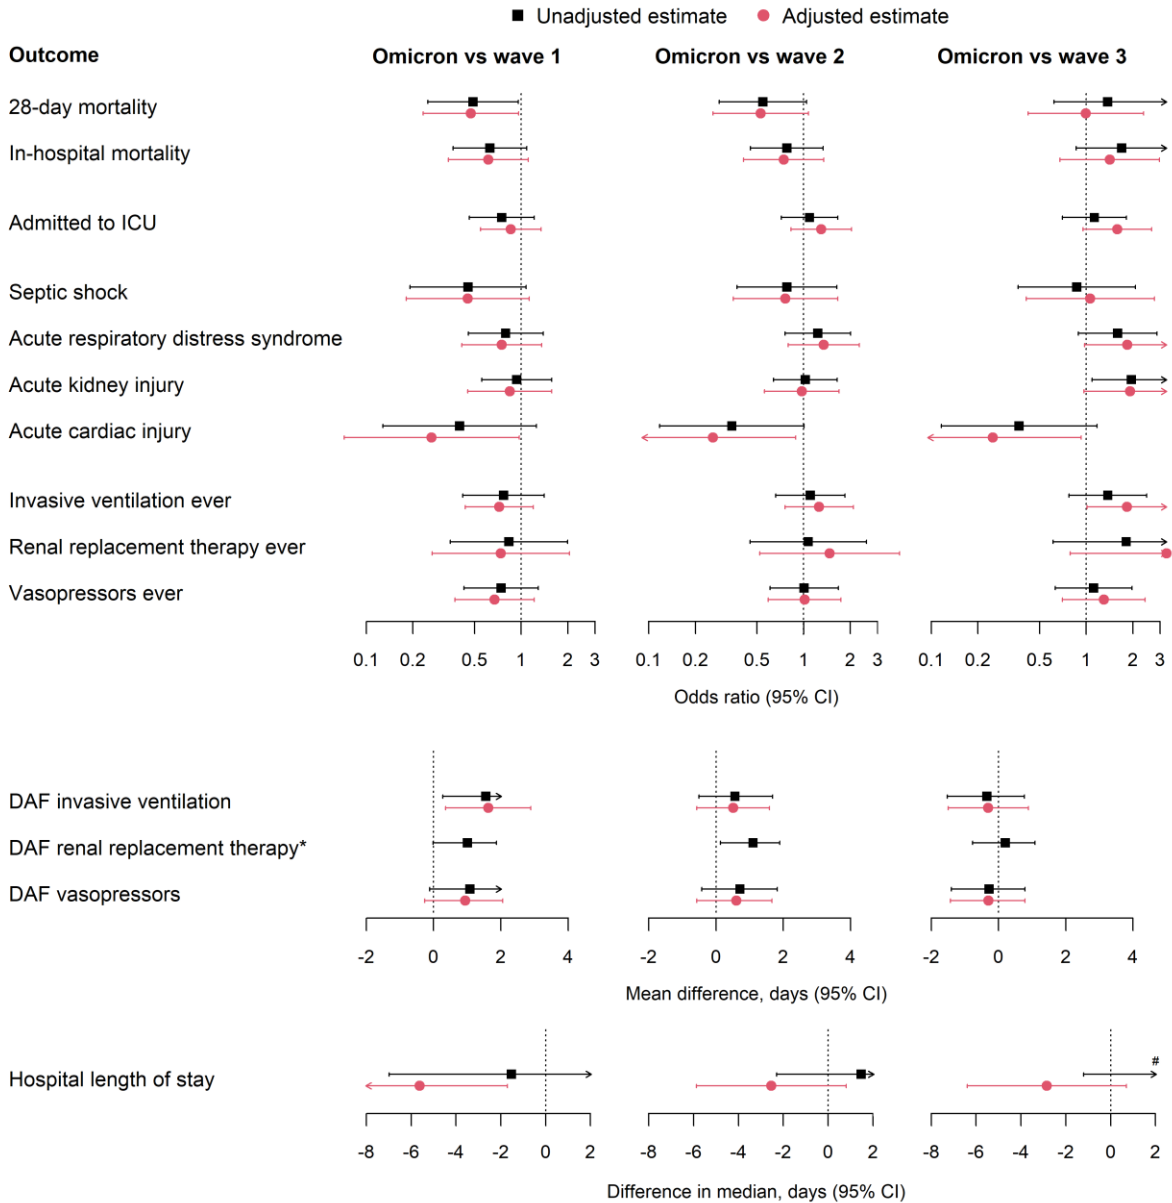

The following factors were accounted for in the adjusted analysis: age, sex, co-morbidities (chronic heart disease, hypertension, chronic kidney disease, diabetes, chronic pulmonary disease, chronic neurological disorder, cancer and chronic hematologic disease), baseline systolic blood pressure, heart rate, SaO<sub>2</sub> and serum creatinine.

\*Adjusted regression analysis was not feasible numerically as too few patients received renal replacement therapy during the first 14 days

# Estimated difference from unadjusted regression analysis was 2.46 days.
